# Supplementary material
Source: Research Square preprint supplement (doi:10.21203/rs.3.rs-8958943/v1)
Supplement: Supplementary file 1 [file 7b30a6cf2c31240fa1c67126.docx]

**Data dictionary**

| Thought _about_ epilepsy | What do you think about epilepsy? | 1= "Brain disease"  2="Natural disease"  3="Witchcraft"  4= "others to indicate" |
| --- | --- | --- |
| Disease _like _other diseases | Is it a disease like any other? | 1= "Yes"  2= "No" |
| If_not _why | If not, why? | 1= "It is a more serious disease"  2= "It is a less serious disease" |
| Disease_curable | Is it a curable disease? | 1= "Yes"  2= "No"  3= "Don’t know" |
| If_not _why | If not, why? | 1="It is an incurable disease"  2= "treatment just relieves the disease" |
| type_treatment _approprieteness | What is the appropriate treatment? | 1= "Medical"  2= "Traditional"  3= "Mixte"  4= "Mixte" |
| age_first_seizure | Age at the first seizure? | 1 = "<1 year"  2 = "1 to 9 years"  3 = "10 to 19 years"  4 = "20 to 29 years"  5 = "30 to 39 years"  6 = "40 to 49 years"  7 = "50 to 60 years"  8 = ">60 years" |
| type_manisfestation | Type of manifestation? | 1 = "Tonic-clonic"  2 = "Tonic"  3 = "Absence"  4 = "Other(s)" |
| consultation_first_seizure | Did you consult anyone after the first seizure? | 1= ’’Yes’’  2= ‘’No’’ |
| If_not _why | If not, why? | 1 = "It wasn't serious"  2 = "It was a shameful illness"  3 = "Transportation problem"  4 = "Money problem for the fee" (or "Lack of money to pay the fee")  5 = "Other(s) to specify" |
| If_yes_how long_did_you_wait before consultation | If so, how long did you wait after the seizure before seeking consultation? | 1 = "Immediately"  2 = "A few days later"  3 = "A few months later" |
| type_person_consultant | Whom did you consult first? | 1 = "A marabout" (a traditional healer/Islamic spiritual healer)  2 = "A pastor"  3 = "A tradipratician"  4 = "A physician »  5= ‘’A pharmacist’’  6= ‘’A nurse’’  7= ’’Other(s) to specify" |
| reason_choice | What was the reason for this choice? | 1 = "You had confidence in him"  2 = "He was recommended to you"  3 = "You knew him to have a reputation"  4 = "You were referred to him"  5 = "Other(s) to specify" |
| place_consultation | Where was the place of consultation located? | 1 = "Village"  2 = "Town"  3 = "Other region"  4 = "Other" |
| perception_caregiver_about _disease severity | What did the consulted person tell you regarding the severity? | 1 = "Trivial"  2 = "Serious"  3 = "Very serious"  4 = "Nothing/Not applicable" |
| perception_caregiver_about_regarding contagiousness | What did the consulted person tell you regarding contagiousness? | 1= ’’Yes’’  2= ‘’No’’  3= ‘’Don’t know’’ |
| mode_contamination | If it is contagious, how? | 1 = "Saliva"  2 = "The sores"  3 = "The sweat"  4 = "Other(s)" |
| perception_caregiver_regarding_curability | What did the consulted person tell you regarding curability? | 1 = "curable"  2 = "quickly curable"  3 = "long to heal" |
| perception_caregiver_regarding_means_cure | What did the consulted person tell you regarding the means of cure? | 1 = "Plants (to drink and/or to wash with)"  2 = "Tablets / Syrup"  3 = "Incantations"  4 = "Prayers"  5 = "A specific diet"  6 = "An amulet"  7 = "A scarification"  8 = "Other(s) to specify" |
| perception_caregiver_regarding_when to_implement_these_measures | When should these measures be implemented ? | 1 = "Outside of the seizures"  2 = "During the seizures"  3 = "Other(s) to specify" |
| dosage | Dosage? | 1 = "1 time/day"  2 = "2 times/day"  3 = "1 time/week"  4 = "2 times/week" |
| perception_about the caregiver before_consultation | Before the consultation, what did you think about this person: | 1 = "I thought he could cure me"  2 = "I thought he could make me better"  3 = "I thought he could not do much" |
| person_participant_mean_cure | Before consulting, what did you think were the means that could allow you to be cured? | 1 = "Plants (to drink and/or to wash with)"  2 = "Tablets / Syrup"  3 = "Incantations"  4 = "Prayers"  5 = "A specific diet"  6 = "An amulet"  7 = "A scarification"  8 = "Without care" |
| perception_about the _necessary_of_these_means | After consultation, do you consider these means probably necessary: | 1 = "Very costly")  2 = "Reasonable"  3 = "Not expensive" |
| treatment_first_seizure | What was the treatment for the very first seizure? | 1 = "Traditional"  2 = "Modern"  3 = "Prayer"  4 = "Mixed" |
| other_caregiver_consultation | Did you consult another person ? | 1= ’’Yes’’  2= ‘’No’’ |
| type_person_consultation | If yes, who was it? | 1 = "A marabout"  2 = "A pastor"  3 = "A tradipractitioner"  4 = "A doctor"  5 = "A pharmacist"  6 = "A nurse"  7 = "Other people to specify" |
| raison consultation | What was the reason for this choice? | 1 = "You had confidence in him/them"  2 = "They (or he/she) were recommended to you"  3 = "You knew him/her/them by reputation"  4 = "You were referred to them"  5 = "Other(s) to specify" |
| place_of_that_person | Where was the place of consultation located? | 1 = "Village"  2 = "Town"  3 = "Other region"  4 = "Other" |
| VAR00030 | What did this/these other consulted person(s) tell you about what was happening to you regarding severity? | 1 = "Minor"  2 = "Serious"  3 = "Very serious"  4 = "Nothing" |
| VAR00031 | What did this/these other consulted person(s) tell you about what was happening to you regarding contagiousness? | 1= ’’Yes’’  2= ‘’No’’  3= ‘’Don’t know’’ |
| VAR00032 | If it is contagious, how? | 1 = "Saliva"  2 = "Sores"  3 = "Sweat"  4 = "Other(s)" |
| VAR00033 | What did this/these other consulted person(s) tell you about what was happening to you regarding curability? | 1 = "Curable"  2 = "Quickly curable"  3 = "Slow to heal" |
| VAR00034 | What did the consulted person(s) tell you regarding the means of cure? | 1 = "Plants (to drink and/or to wash with)"  2 = "Tablets / Syrup"  3 = "Incantations"  4 = "Prayers"  5 = "A specific diet"  6 = "An amulet"  7 = "A scarification"  8 = "Other(s) to specify |
| VAR00035 | When should these measures be implemented? | 1 = "Outside of the seizures"  2 = "During the seizures"  3 = "Other(s) to specify" |
| VAR00036 | Dosage | 1 = "1 time/day"  2 = "2 times/day"  3 = "Other(s) to specify" |
| VAR00037 | Before the consultation, what did you think about this/these other person(s): | 1 = "I thought he/she/they could cure me"  2 = "I thought he/she/they could improve me"  3 = "I thought he/she/they could not do much"  4 = "Don’t know" |
| VAR00038 | Before this/these other consultation(s), what did you think were the means that could allow you to be cured? | 1 = "Plants (to drink and/or to wash with)"  2 = "Tablets / Syrup"  3 = "Incantations"  4 = "Prayers"  5 = "A specific diet"  6 = "An amulet"  7 = "A scarification"  8 = "Without care" |
| VAR00039 | After consultation, do you consider these means probably necessary: | 1 = "Very costly"  2 = "Reasonable"  3 = "Not expensive"  4 = "Don’t know" |
| VAR00040 | What type of treatment was then prescribed to you by this/these other person(s)? | 1 = "Traditional"  2 = "Modern"  3 = "Mixed" |
| VAR00041 | Do you find this/these second pathway(s) of care (if multiple) more beneficial than the first? | 1= ’’Yes’’  2= ‘’No’’ |
| VAR00042 | By which of these persons are you regularly followed up? | 1 = "The 1st"  2 = "The 2nd"  3 = "The nth (to specify)" |
| VAR00043 | How many consultations have you had in the past 6 months? | 1 = "One"  2 = "Two"  3 = "Three"  4 = "Four"  5 = "Five"  6 = "Six"  7 = "n (to specify)"  8 = "Don’t know" |
| VAR00044 | When did the last consultation take place? | 1 = "It was less than a month ago"  2 = "Between 1 and 3 months"  3 = "Between 3 and 6 months"  4 = "More than 6 months"  5 = "Not sure" |
| VAR00045 | Whom did you consult the last time? | 1 = "The 1st person"  2 = "The 2nd person"  3 = "The nth person (to specify)"  4 = "Don’t know" |
| VAR00046 | What type of treatment was prescribed at that consultation? | 1 = "Traditional"  2 = "Modern"  3 = "Mixed" |
| VAR00059 | Types of antiepileptic drugs? | 1 = "Gardenal (Phenobarbital)"  2 = "Depakine (Valproate of sodium) — Depakote (sodium valproate / valproic acid)"  3= "Tegretol (Carbamazepine)"  4 = "Lamictal (Lamotrigine)"  5 = "Keppra (Levetiracetam)"  6 = "Bitherapy (Carbamazepine plus valproate of sodium)"  7 = "Bitherapy (Carbamazepine plus Levetiracetam)"  8 = "Bitherapy (Valproate of sodium plus Levetiracetam)"  9 = "Bitherapy (Valproate of sodium plus Phenobarbital)"  10="Bitherapy (Carbamazepineplus Phenobarbital)" |
| VAR00060 | Persistence of seizures | 1= "Yes"  2= "No" |
| VAR00047 | How much did this most recent consultation cost you in transportation expenses? | 1 = "< 1000 FCFA"  2 = "Between 1000 FCFA and 10000 FCFA"  3 = "> 10000 FCFA"  4 = "Don't know" |
| VAR00048 | How much did this most recent consultation cost you in practitioner’s fees? | 1 = "20000 FCFA"  2 = "1000 FCFA" |
| VAR00049 | How much did this most recent consultation cost you for the medications obtained? | 1 = "< 7500"  2 = "Between 7500 FCFA and 20000 FCFA"  3 = "> 20000 FCFA"  4 = "Don't know" |
| VAR00050 | Was a follow-up consultation scheduled? | 1= "Yes"  2= "No" |
| VAR00051 | If yes, what interval separates it from the previous one? | 1 = "< 1 month"  2 = "Between 1 and 3 months"  3 = "Between 4 and 6 months"  4 = ">= 6 months"  5 = "Don't know" |
| VAR00052 | Do the medications obtained cover the entire interval? | 1= "Yes"  2= "No" |
| VAR00053 | If not, how many days do they cover? | 1 = "A few days"  2 = "A few months"  3 = "Don't know" |
| VAR00054 | Did you stop treatment for a period of time? | 1= "Yes"  2= "No" |
| VAR00055 | If yes, why? | 1 = "The person consulted had told you"  2 = "You would get better"  3 = "Forgot"  4 = "Side effects had appeared"  5 = "Geographic accessibility"  6 = "Passage remission"  7 = "Financial concern" |
| VAR00056 | What distance (in km) do you have to travel to reach the consultation site? | 1 = "< 100 km"  2 = "Between 100 and 500 km"  3 = "> 500 km"  4 = "Don't know" |
| VAR00057 | Does this constitute a barrier to continuing treatment? | 1= "Yes"  2= "No" |
